# Supplementary material
Source: MDPI journal article supplement (https://www.mdpi.com/2227-9709/9/4/77)

## Supplementary Data

### 1. Patent Analysis Data

#### 1) Augmented Reality

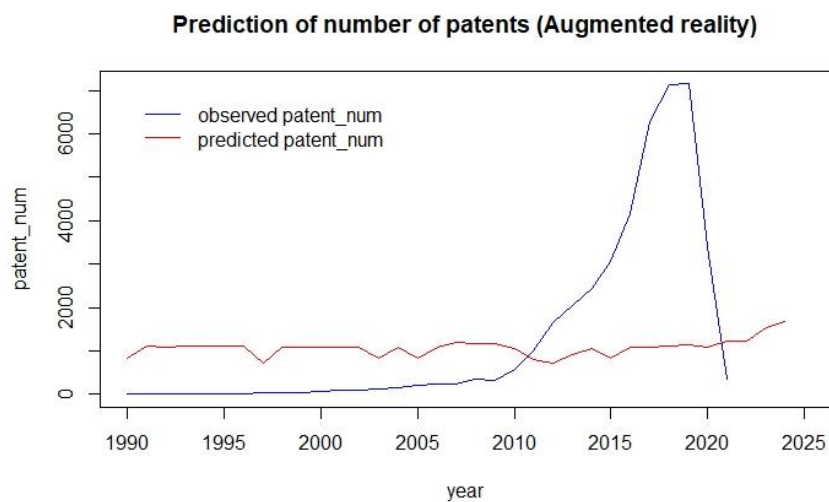

#### 2) Collaborative Telepresence

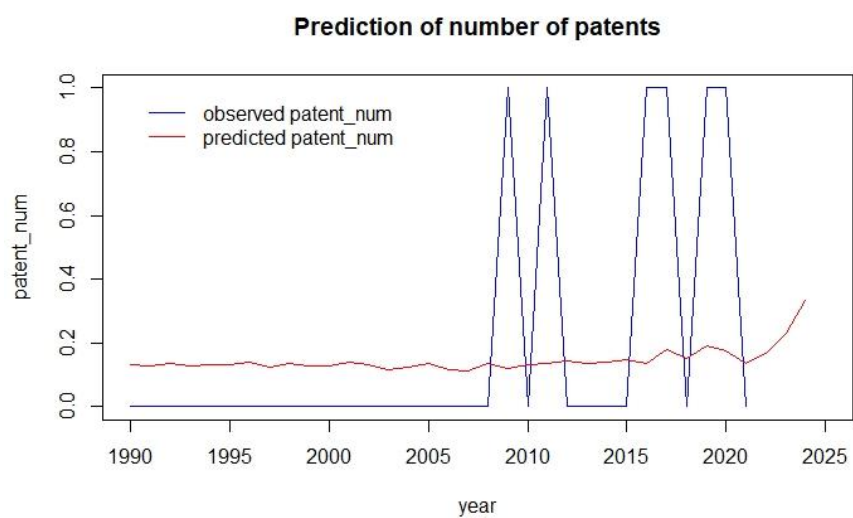

| word       | TF | DF | TF_IDF     |
|------------|----|----|------------|
| segment    | 14 | 2  | 9.70406053 |
| object     | 7  | 1  | 7.69028602 |
| candidates | 10 | 2  | 6.93147181 |
| target     | 6  | 1  | 6.59167373 |
| devices    | 8  | 2  | 5.54517744 |
| electronic | 8  | 2  | 5.54517744 |

|                    |   |   |            |
|--------------------|---|---|------------|
| physical           | 4 | 1 | 4.39444915 |
| set                | 4 | 1 | 4.39444915 |
| beacon             | 6 | 2 | 4.15888308 |
| device             | 6 | 2 | 4.15888308 |
| receivercontroller | 6 | 2 | 4.15888308 |
| Submitted          | 6 | 2 | 4.15888308 |
| work               | 6 | 2 | 4.15888308 |
| data               | 3 | 1 | 3.29583687 |
| information        | 3 | 1 | 3.29583687 |
| visual             | 3 | 1 | 3.29583687 |
| coupled            | 4 | 2 | 2.77258872 |
| candidate          | 4 | 2 | 2.77258872 |
| network            | 4 | 2 | 2.77258872 |
| plurality          | 4 | 2 | 2.77258872 |
| votes              | 4 | 2 | 2.77258872 |
| voting             | 4 | 2 | 2.77258872 |
| audience           | 6 | 3 | 2.43279065 |
| avatars            | 2 | 1 | 2.19722458 |
| determined         | 2 | 1 | 2.19722458 |
| displayed          | 2 | 1 | 2.19722458 |
| element            | 2 | 1 | 2.19722458 |
| lampsbased         | 2 | 1 | 2.19722458 |
| mapped             | 2 | 1 | 2.19722458 |
| objects            | 2 | 1 | 2.19722458 |

---

### 3) Digital Medicine

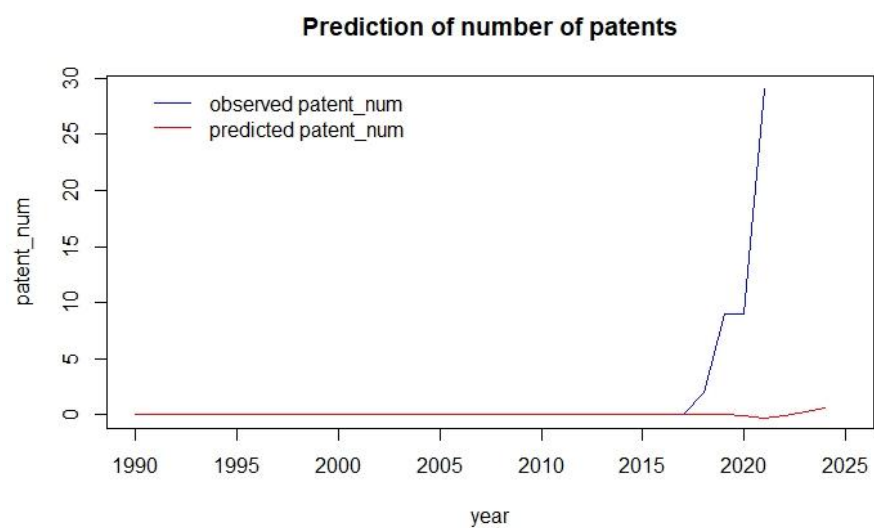

| word          | TF | DF | TF_IDF     |
|---------------|----|----|------------|
| medical       | 48 | 8  | 85.1072321 |
| dataset       | 46 | 11 | 68.3277221 |
| device        | 70 | 19 | 68.2191748 |
| data          | 95 | 26 | 64.0732295 |
| image         | 27 | 6  | 54.6583076 |
| content       | 20 | 3  | 51.679951  |
| delivery      | 20 | 4  | 47.21708   |
| user          | 50 | 21 | 43.962473  |
| medication    | 17 | 3  | 43.9279584 |
| drug          | 13 | 1  | 42.6028815 |
| learning      | 22 | 7  | 41.5987082 |
| communication | 28 | 11 | 41.5907874 |
| microbiome    | 20 | 6  | 40.4876353 |
| images        | 22 | 8  | 39.0074814 |
| set           | 35 | 17 | 37.7972054 |
| supplementary | 25 | 11 | 37.1346316 |
| gan           | 14 | 3  | 36.1759657 |
| patient       | 19 | 7  | 35.9261571 |
| devices       | 20 | 8  | 35.4613467 |
| condition     | 26 | 13 | 34.6120992 |
| andor         | 23 | 11 | 34.1638611 |
| program       | 19 | 8  | 33.6882794 |
| model         | 19 | 8  | 33.6882794 |
| ingestible    | 13 | 3  | 33.5919682 |
| system        | 70 | 32 | 33.1649046 |
| active        | 14 | 4  | 33.051956  |
| group         | 10 | 1  | 32.7714473 |
| information   | 16 | 6  | 32.3901082 |
| care          | 16 | 6  | 32.3901082 |

|            |    |    |          |
|------------|----|----|----------|
| configured | 24 | 13 | 31.94963 |
|------------|----|----|----------|

---

#### 4) DNA Data Storage

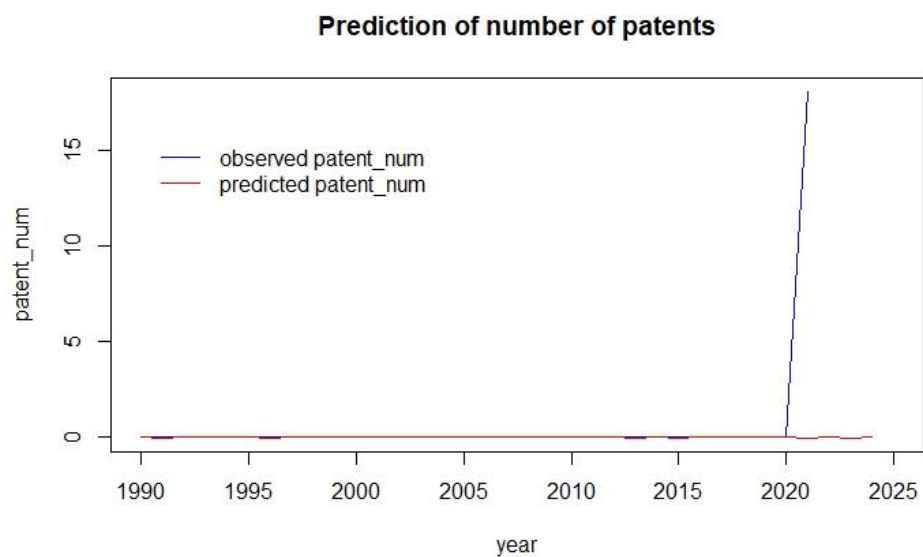

| word            | TF | DF | TF_IDF     |
|-----------------|----|----|------------|
| end             | 13 | 1  | 29.9336062 |
| data            | 56 | 11 | 28.6062349 |
| linker          | 12 | 1  | 27.6310211 |
| nucleic         | 30 | 8  | 23.9552309 |
| vdna            | 10 | 1  | 23.0258509 |
| library         | 19 | 5  | 22.8754833 |
| acid            | 28 | 8  | 22.3582155 |
| sequence        | 23 | 7  | 21.0746868 |
| dna             | 42 | 12 | 18.0928825 |
| molecules       | 13 | 4  | 18.0218267 |
| symbol          | 9  | 2  | 17.0740799 |
| polynucleotides | 7  | 1  | 16.1180957 |
| vesicles        | 7  | 1  | 16.1180957 |
| synthesis       | 13 | 5  | 15.6516465 |
| polymer         | 6  | 1  | 13.8155106 |

|             |    |   |            |
|-------------|----|---|------------|
| fragment    | 6  | 1 | 13.8155106 |
| overhanging | 6  | 1 | 13.8155106 |
| techniques  | 8  | 3 | 12.8755033 |
| strands     | 8  | 3 | 12.8755033 |
| information | 13 | 7 | 11.9117795 |
| hash        | 5  | 1 | 11.5129255 |
| homopolymer | 6  | 2 | 11.3827199 |
| memory      | 6  | 2 | 11.3827199 |
| tracts      | 6  | 2 | 11.3827199 |
| associated  | 6  | 2 | 11.3827199 |
| system      | 7  | 3 | 11.2660654 |
| encoding    | 11 | 7 | 10.0791981 |
| libraries   | 6  | 3 | 9.65662747 |
| nucleotides | 6  | 3 | 9.65662747 |
| embodiments | 6  | 3 | 9.65662747 |

#### 5) Electric Aviation

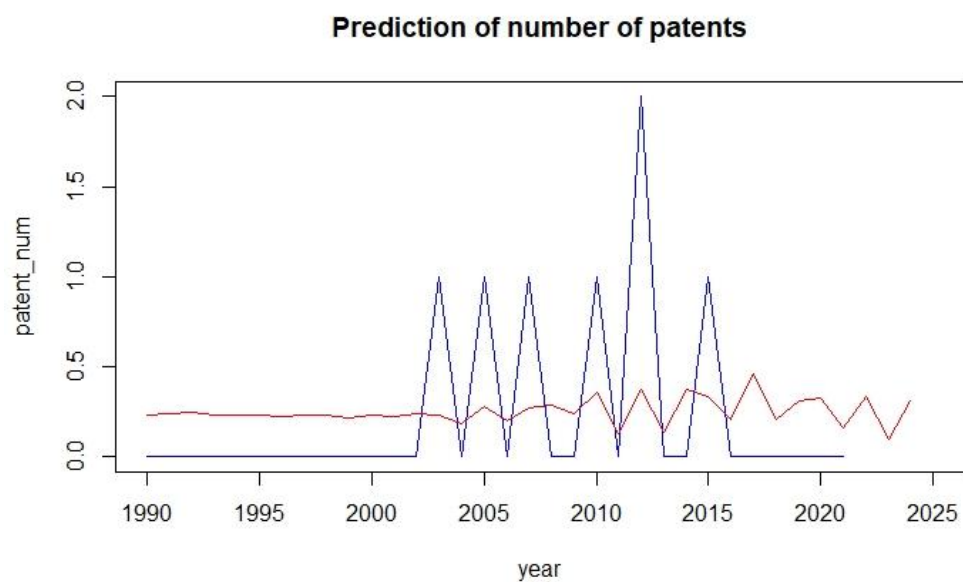

| word   | TF | DF | TF_IDF     |
|--------|----|----|------------|
| system | 19 | 2  | 16.0986593 |

|           |    |   |            |
|-----------|----|---|------------|
| driver    | 8  | 1 | 10.0221037 |
| fuel      | 11 | 2 | 9.32027646 |
| interface | 10 | 2 | 8.4729786  |
| control   | 9  | 2 | 7.62568074 |
| cavity    | 6  | 1 | 7.51657781 |
| powder    | 6  | 1 | 7.51657781 |
| method    | 10 | 3 | 5.59615788 |
| surface   | 4  | 1 | 5.01105187 |
| enclosure | 4  | 1 | 5.01105187 |
| blade     | 8  | 3 | 4.4769263  |
| coupling  | 5  | 2 | 4.2364893  |
| engine    | 5  | 2 | 4.2364893  |
| portion   | 5  | 2 | 4.2364893  |
| airfoil   | 5  | 2 | 4.2364893  |
| onboard   | 3  | 1 | 3.75828891 |
| vtol      | 3  | 1 | 3.75828891 |
| fsi1      | 3  | 1 | 3.75828891 |
| fsi2      | 3  | 1 | 3.75828891 |
| articles  | 3  | 1 | 3.75828891 |
| different | 3  | 1 | 3.75828891 |
| layer     | 3  | 1 | 3.75828891 |
| platform  | 3  | 1 | 3.75828891 |
| platinum  | 3  | 1 | 3.75828891 |
| overspeed | 4  | 2 | 3.38919144 |
| gas       | 10 | 4 | 3.36472237 |
| coating   | 5  | 3 | 2.79807894 |
| least     | 3  | 2 | 2.54189358 |
| aircraft  | 2  | 1 | 2.50552594 |
| electric  | 2  | 1 | 2.50552594 |

---

## 6) Electroceuticals

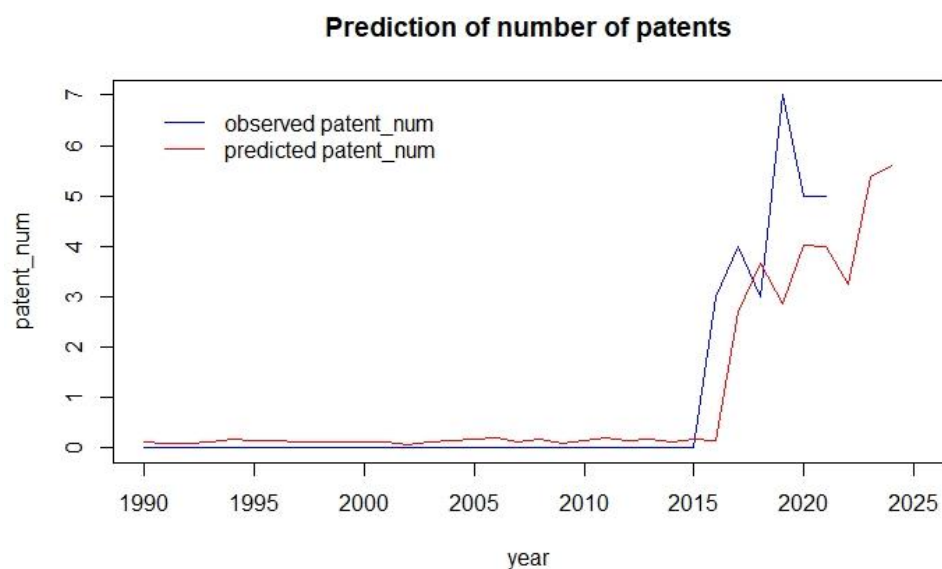

| word        | TF | DF | TF_IDF     |
|-------------|----|----|------------|
| implantable | 50 | 10 | 44.8970797 |
| configured  | 47 | 10 | 42.2032549 |
| signal      | 34 | 7  | 41.357441  |
| pain        | 18 | 2  | 39.5500424 |
| circuit     | 26 | 5  | 39.1060123 |
| ultrasonic  | 31 | 8  | 34.0569809 |
| therapy     | 17 | 3  | 32.4622226 |
| described   | 27 | 8  | 29.6625318 |
| electrical  | 24 | 7  | 29.1934878 |
| patient     | 15 | 3  | 28.6431376 |
| cancer      | 21 | 6  | 28.3484611 |
| information | 12 | 2  | 26.3666949 |
| power       | 19 | 6  | 25.6486076 |
| devices     | 30 | 11 | 24.3279065 |
| tissue      | 18 | 6  | 24.2986809 |
| fiber       | 9  | 1  | 23.4242072 |
| material    | 9  | 1  | 23.4242072 |



|             |    |    |            |
|-------------|----|----|------------|
| data        | 17 | 6  | 22.9487542 |
| management  | 12 | 3  | 22.9145101 |
| trigger     | 13 | 4  | 21.9231864 |
| device      | 33 | 13 | 21.6737247 |
| analyte     | 12 | 4  | 20.2367874 |
| pressure    | 12 | 4  | 20.2367874 |
| temperature | 12 | 4  | 20.2367874 |
| amount      | 13 | 5  | 19.5530062 |
| cells       | 14 | 6  | 18.898974  |
| stimulation | 7  | 1  | 18.2188278 |
| processor   | 7  | 1  | 18.2188278 |
| emit        | 18 | 9  | 17.8785319 |
| embodiments | 8  | 2  | 17.5777966 |

## 7) Gene drive

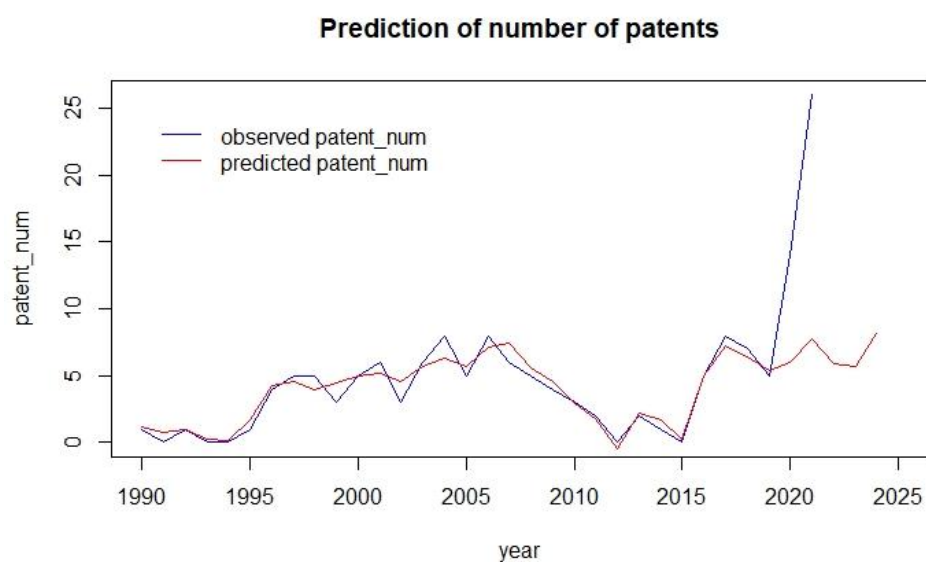

| word      | TF  | DF | TF_IDF     |
|-----------|-----|----|------------|
| nucleic   | 105 | 40 | 137.582388 |
| prostate  | 64  | 17 | 136.544561 |
| invention | 168 | 74 | 118.673924 |

|                  |     |    |            |
|------------------|-----|----|------------|
| polypeptides     | 50  | 14 | 115.791516 |
| cells            | 75  | 33 | 112.314    |
| gene             | 114 | 57 | 109.831876 |
| expression       | 85  | 43 | 105.373725 |
| dna              | 65  | 30 | 103.343066 |
| acid             | 71  | 36 | 100.320345 |
| proteins         | 41  | 13 | 97.7777508 |
| acids            | 63  | 32 | 96.2244964 |
| cell             | 70  | 39 | 93.4500747 |
| protein          | 55  | 28 | 91.112158  |
| delta6desaturase | 32  | 8  | 90.4529902 |
| present          | 70  | 42 | 88.3876284 |
| relates          | 50  | 25 | 88.2891991 |
| isolated         | 45  | 24 | 81.2252113 |
| sequence         | 51  | 31 | 79.4653755 |
| methods          | 102 | 70 | 77.6424657 |
| vhhl             | 19  | 2  | 74.5800964 |
| encoding         | 43  | 27 | 72.7420685 |
| comprising       | 54  | 39 | 72.0900576 |
| least            | 34  | 18 | 70.7010124 |
| antigen          | 33  | 17 | 70.4057892 |
| human            | 29  | 13 | 69.1598725 |
| genetic          | 25  | 9  | 68.0323857 |
| compositions     | 45  | 34 | 66.0839607 |
| genes            | 30  | 16 | 65.7200153 |
| recombinant      | 34  | 21 | 65.7164943 |
| plants           | 32  | 19 | 64.9007439 |

---

## 8) Green ammonia

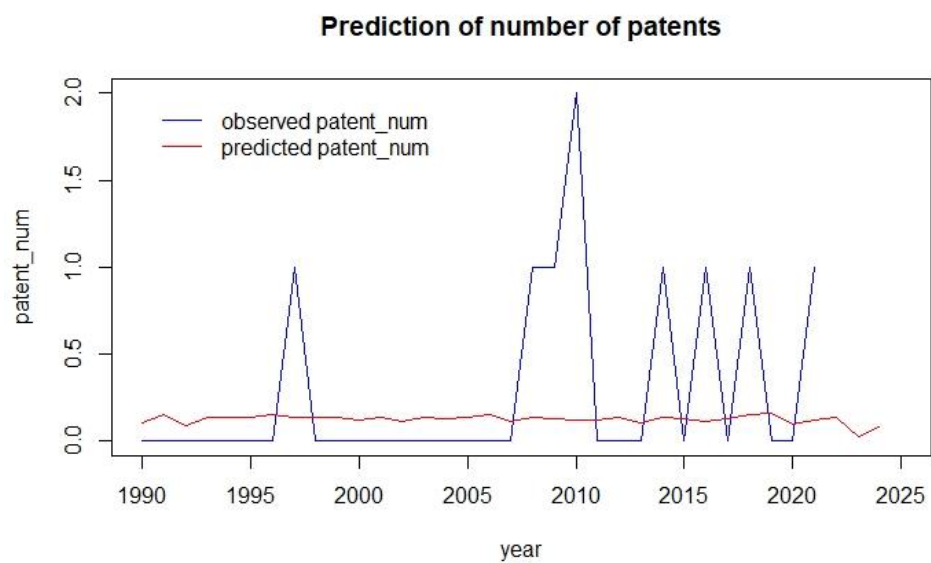

| word       | TF | DF | TF_IDF     |
|------------|----|----|------------|
| hydrogen   | 8  | 1  | 14.3340758 |
| canisters  | 10 | 2  | 13.8629436 |
| filter     | 10 | 2  | 13.8629436 |
| reaction   | 13 | 4  | 11.3810936 |
| activated  | 8  | 2  | 11.0903549 |
| charcoal   | 8  | 2  | 11.0903549 |
| article    | 6  | 1  | 10.7505568 |
| odor       | 6  | 1  | 10.7505568 |
| sensing    | 9  | 3  | 9.8875106  |
| indicating | 5  | 1  | 8.95879735 |
| ammonia    | 12 | 5  | 8.31776617 |
| acid       | 7  | 3  | 7.69028602 |
| cracking   | 4  | 1  | 7.16703788 |
| unit       | 4  | 1  | 7.16703788 |
| absorbing  | 4  | 1  | 7.16703788 |
| agent      | 4  | 1  | 7.16703788 |
| odors      | 4  | 1  | 7.16703788 |
| visual     | 4  | 1  | 7.16703788 |

|                  |   |   |            |
|------------------|---|---|------------|
| medium           | 4 | 1 | 7.16703788 |
| combination      | 6 | 3 | 6.59167373 |
| distinct         | 6 | 3 | 6.59167373 |
| dyes             | 6 | 3 | 6.59167373 |
| element          | 6 | 3 | 6.59167373 |
| identity         | 6 | 3 | 6.59167373 |
| microorganism    | 6 | 3 | 6.59167373 |
| presence         | 6 | 3 | 6.59167373 |
| quantity         | 6 | 3 | 6.59167373 |
| copperii ammonia | 6 | 3 | 6.59167373 |
| hydroxide        | 6 | 3 | 6.59167373 |
| muconic          | 6 | 3 | 6.59167373 |

#### 9) Green Hydrogen

**Prediction of number of patents**

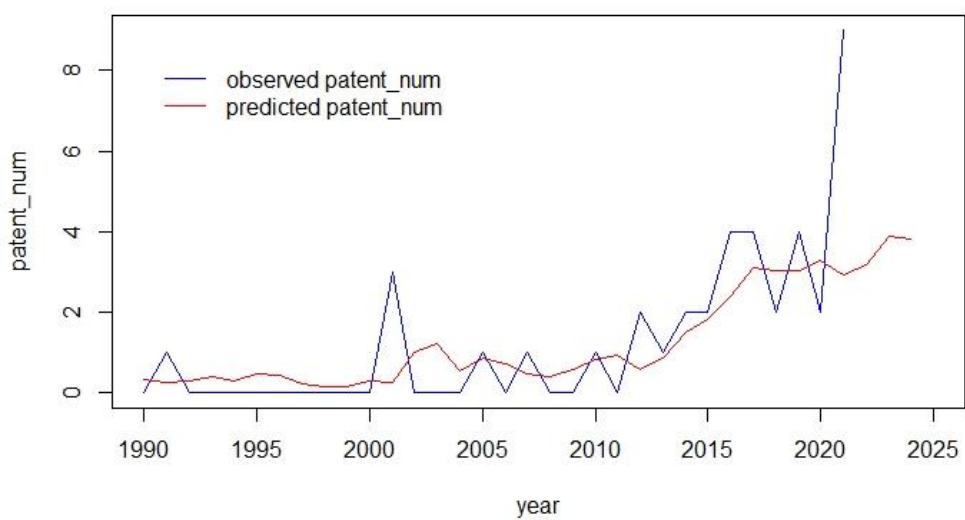

| word      | TF | DF | TF_IDF     |
|-----------|----|----|------------|
| hydrogen  | 45 | 15 | 44.4875127 |
| gas       | 25 | 8  | 39.0993885 |
| acid      | 28 | 10 | 38.1725356 |
| compounds | 17 | 6  | 30.8599294 |

|            |    |    |            |
|------------|----|----|------------|
| node       | 10 | 1  | 30.6805294 |
| methods    | 20 | 9  | 29.1723005 |
| power      | 18 | 9  | 26.2550704 |
| comprising | 19 | 10 | 25.902792  |
| oxide      | 12 | 4  | 25.8211464 |
| aqueous    | 13 | 5  | 25.6027284 |
| charge     | 8  | 1  | 24.5444235 |
| plasma     | 9  | 2  | 23.9632904 |
| light      | 9  | 2  | 23.9632904 |
| magnesium  | 10 | 3  | 23.7490575 |
| molecule   | 10 | 3  | 23.7490575 |
| system     | 18 | 11 | 22.9732824 |
| optical    | 7  | 1  | 21.4763705 |
| molecules  | 9  | 3  | 21.3741518 |
| calcium    | 8  | 2  | 21.3007026 |
| polymer    | 8  | 2  | 21.3007026 |
| tubulin    | 8  | 2  | 21.3007026 |
| producing  | 10 | 5  | 19.6944065 |
| least      | 10 | 5  | 19.6944065 |
| material   | 9  | 4  | 19.3658598 |
| method     | 16 | 12 | 19.1400121 |
| compound   | 8  | 3  | 18.999246  |
| process    | 12 | 8  | 18.7677065 |
| sulfuric   | 7  | 2  | 18.6381148 |
| beam       | 7  | 2  | 18.6381148 |
| boron      | 7  | 2  | 18.6381148 |

---

#### 10) Personalized medicine

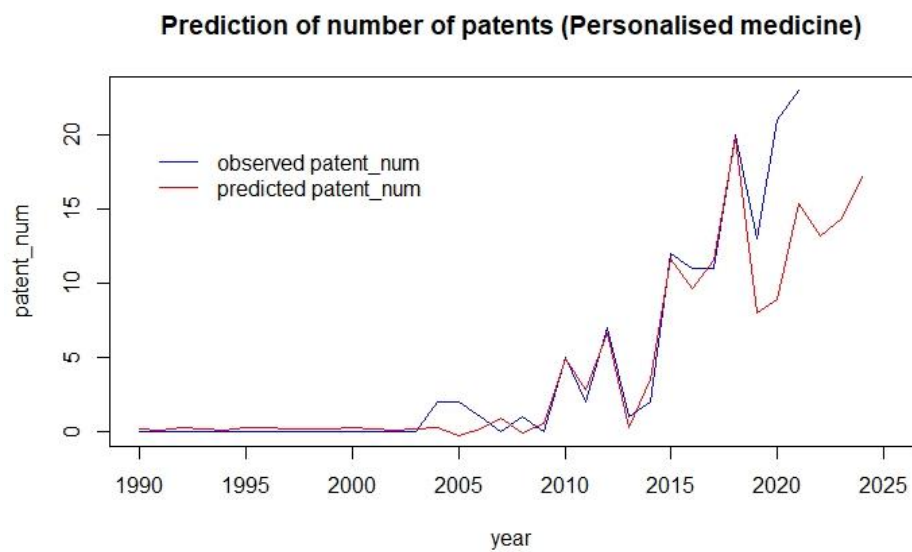

| word       | TF | DF | TF_IDF     |
|------------|----|----|------------|
| data       | 53 | 13 | 119.715471 |
| image      | 30 | 4  | 98.6520566 |
| cells      | 52 | 20 | 96.3725028 |
| sample     | 50 | 19 | 95.1053763 |
| compounds  | 56 | 29 | 83.8119754 |
| method     | 67 | 38 | 82.6966363 |
| phase      | 23 | 3  | 80.7655451 |
| present    | 71 | 45 | 75.9130866 |
| cell       | 56 | 34 | 75.1795374 |
| cancer     | 40 | 21 | 72.2718939 |
| relates    | 79 | 53 | 71.7996045 |
| solid      | 23 | 5  | 71.4398476 |
| methods    | 70 | 48 | 70.4213651 |
| subject    | 36 | 18 | 70.3224295 |
| expression | 28 | 10 | 69.9984468 |
| invention  | 92 | 63 | 67.9840179 |
| region     | 25 | 8  | 67.5153806 |
| treatment  | 63 | 45 | 67.3594994 |
| fluid      | 22 | 6  | 64.9424523 |
| comparator | 16 | 2  | 60.7876402 |
| agent      | 25 | 11 | 60.3233288 |
| comprising | 53 | 42 | 60.2419033 |
| set        | 18 | 4  | 59.191234  |
| moiety     | 21 | 8  | 56.7129197 |
| targeting  | 21 | 8  | 56.7129197 |
| binding    | 24 | 12 | 55.9893706 |
| system     | 29 | 19 | 55.1611183 |
| patient    | 20 | 8  | 54.0123045 |
| and/or     | 29 | 20 | 53.7462035 |

compositions 39 33 53.4876917

---

# 11) Plasmonic materials

**Prediction of number of patents (Plasmonic materials)**

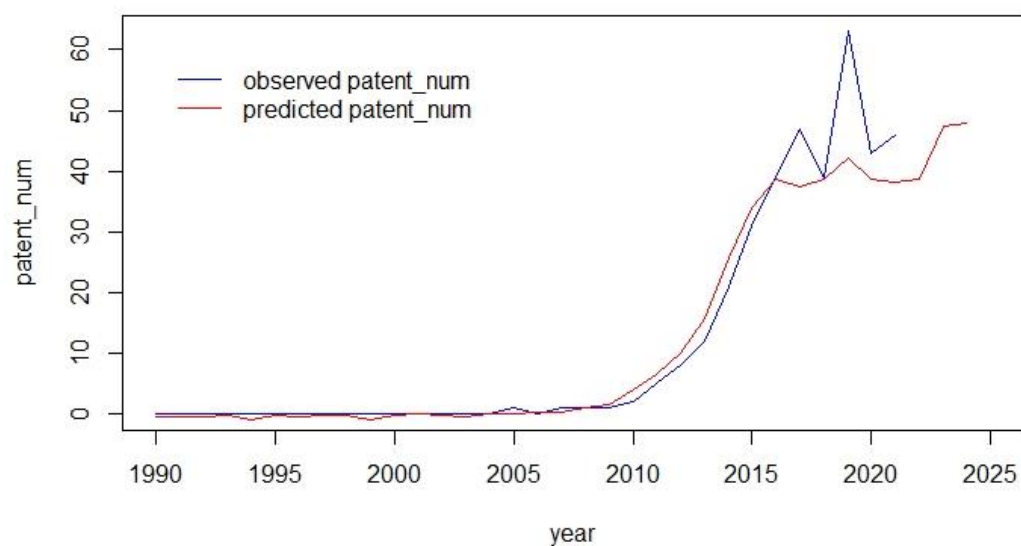

| word       | TF  | DF  | TF_IDF |
|------------|-----|-----|--------|
| layer      | 355 | 103 | 442.77 |
| material   | 353 | 124 | 375.36 |
| surface    | 326 | 130 | 331.36 |
| structure  | 158 | 49  | 312.78 |
| peg        | 133 | 36  | 303.34 |
| light      | 194 | 78  | 295.31 |
| optical    | 158 | 59  | 283.97 |
| region     | 108 | 26  | 280.35 |
| waveguide  | 126 | 50  | 246.94 |
| plasmonic  | 206 | 111 | 241.67 |
| metal      | 105 | 39  | 231.29 |
| devices    | 166 | 91  | 227.40 |
| transducer | 186 | 106 | 226.70 |
| least      | 179 | 102 | 224.99 |



|                 |     |    |        |
|-----------------|-----|----|--------|
| positioned      | 109 | 46 | 222.52 |
| magnetic        | 105 | 43 | 221.28 |
| portion         | 114 | 51 | 221.21 |
| substrate       | 150 | 84 | 217.35 |
| nft             | 109 | 50 | 213.62 |
| dielectric      | 102 | 44 | 212.67 |
| nearfield       | 100 | 48 | 199.98 |
| oxide           | 69  | 21 | 193.24 |
| configured      | 105 | 59 | 188.72 |
| device          | 115 | 74 | 181.03 |
| field           | 131 | 90 | 180.88 |
| film            | 70  | 29 | 174.33 |
| thereof         | 73  | 33 | 172.67 |
| conductive      | 70  | 30 | 172.04 |
| electromagnetic | 66  | 26 | 171.32 |

## 12) Quantum Sensing

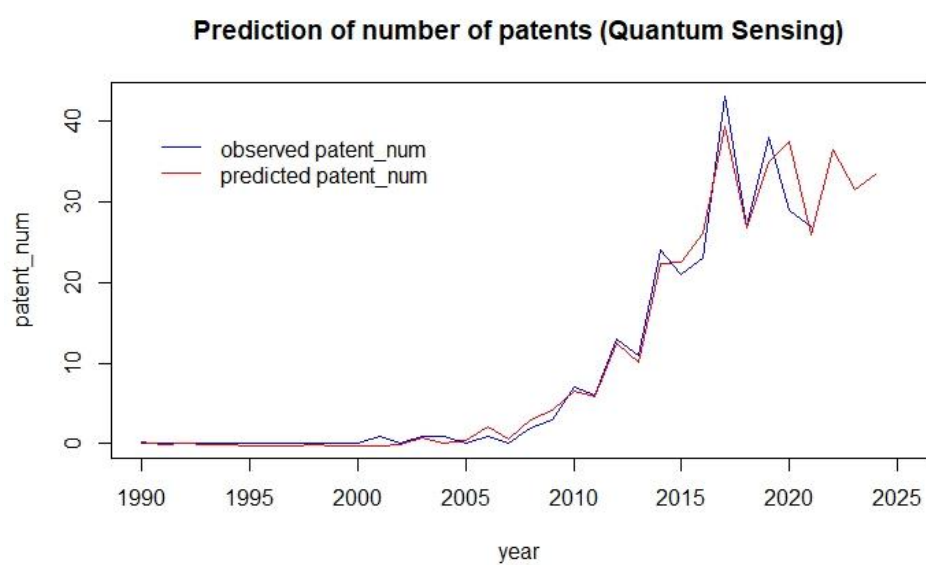

| word  | TF  | DF | TF_IDF |
|-------|-----|----|--------|
| layer | 203 | 45 | 369.53 |

|                 |     |    |        |
|-----------------|-----|----|--------|
| material        | 285 | 93 | 315.12 |
| light           | 181 | 54 | 297.14 |
| quantum         | 152 | 42 | 286.94 |
| diamond         | 150 | 41 | 286.70 |
| optical         | 180 | 59 | 279.83 |
| magnetic        | 171 | 67 | 244.44 |
| spin            | 80  | 13 | 240.79 |
| field           | 122 | 47 | 216.89 |
| excitation      | 97  | 32 | 208.79 |
| device          | 183 | 90 | 208.27 |
| semiconductor   | 132 | 58 | 207.43 |
| nanometers      | 48  | 4  | 193.90 |
| configured      | 124 | 59 | 192.77 |
| signal          | 102 | 42 | 192.55 |
| region          | 72  | 20 | 187.52 |
| substrate       | 105 | 49 | 182.38 |
| source          | 98  | 44 | 180.55 |
| surface         | 90  | 41 | 172.02 |
| frequency       | 83  | 39 | 162.69 |
| defect          | 61  | 19 | 161.85 |
| diode           | 55  | 14 | 161.75 |
| detector        | 97  | 56 | 155.77 |
| system          | 87  | 53 | 144.42 |
| sensor          | 61  | 26 | 143.54 |
| magneto-optical | 46  | 12 | 141.87 |
| unit            | 41  | 8  | 141.52 |
| micro           | 44  | 11 | 139.22 |
| array           | 57  | 25 | 136.28 |

---

### 13) Social Robots

**Prediction of number of patents**

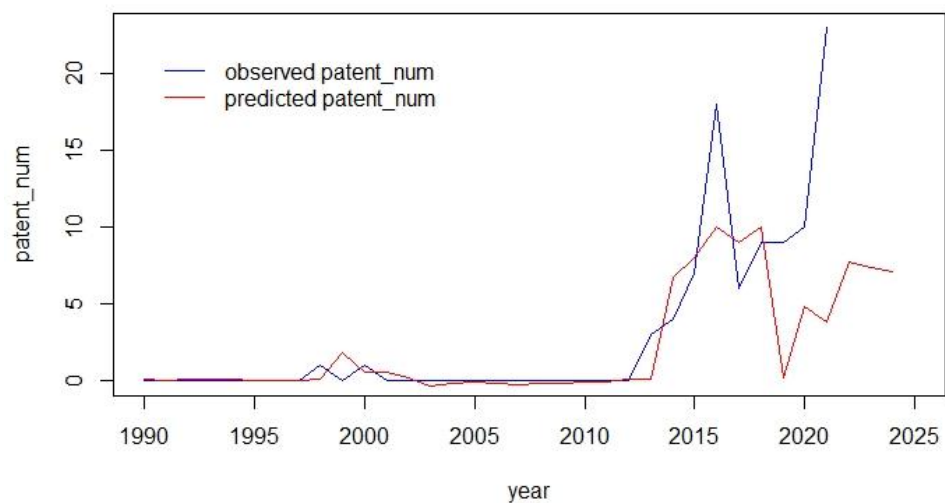

| word        | TF  | DF | TF_IDF     |
|-------------|-----|----|------------|
| patient     | 89  | 9  | 196.536423 |
| robot       | 138 | 29 | 153.133373 |
| monitoring  | 85  | 17 | 137.741459 |
| information | 97  | 29 | 107.637226 |
| system      | 124 | 38 | 105.064935 |
| optical     | 45  | 8  | 104.113572 |
| social      | 74  | 22 | 101.777032 |
| task        | 43  | 8  | 99.486302  |
| least       | 143 | 45 | 97.5571897 |
| user        | 74  | 25 | 92.7044597 |
| sensor      | 55  | 17 | 89.1268262 |
| device      | 139 | 48 | 86.04645   |
| telemetry   | 45  | 14 | 81.1264187 |
| signal      | 32  | 8  | 74.0363177 |
| network     | 40  | 15 | 69.5308314 |
| image       | 30  | 8  | 69.4090479 |
| video       | 27  | 6  | 69.2536327 |
| snet        | 26  | 6  | 66.6886833 |

|           |    |    |            |
|-----------|----|----|------------|
| dialog    | 18 | 2  | 61.4204499 |
| object    | 35 | 15 | 60.8394774 |
| data      | 48 | 25 | 60.1326225 |
| content   | 23 | 6  | 58.9938352 |
| method    | 50 | 27 | 58.9327498 |
| circuitry | 34 | 16 | 57.0399695 |
| human     | 35 | 17 | 56.7170712 |
| detector  | 22 | 6  | 56.4288859 |
| set       | 26 | 10 | 54.9370701 |
| services  | 20 | 5  | 54.3820007 |
| sensors   | 33 | 17 | 53.4760957 |
| action    | 26 | 11 | 52.6747743 |

#### 14) Spatial Computing

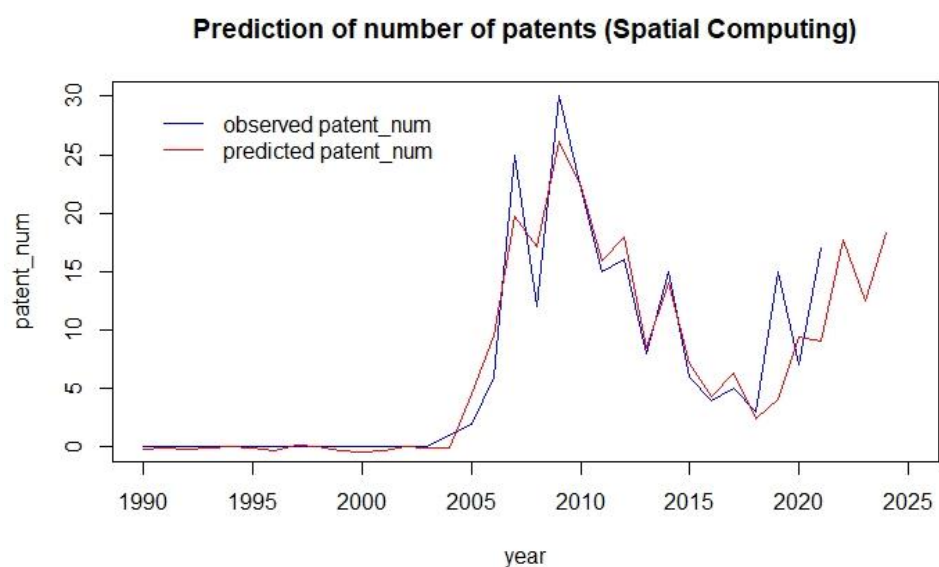

| word          | TF  | DF  | TF_IDF     |
|---------------|-----|-----|------------|
| configurable  | 453 | 109 | 297.215977 |
| data          | 318 | 84  | 290.631336 |
| circuits      | 361 | 104 | 253.647959 |
| configuration | 158 | 42  | 252.071013 |

|                |     |     |            |
|----------------|-----|-----|------------|
| set            | 382 | 111 | 243.749388 |
| memory         | 109 | 27  | 220.657612 |
| routing        | 108 | 27  | 218.633231 |
| circuit        | 355 | 115 | 214.06361  |
| logic          | 164 | 58  | 209.764008 |
| tile           | 72  | 12  | 200.997858 |
| input          | 125 | 43  | 196.54958  |
| reconfigurable | 86  | 25  | 180.470117 |
| method         | 128 | 53  | 175.053085 |
| nodes          | 76  | 21  | 172.18133  |
| several        | 181 | 82  | 169.731966 |
| storage        | 79  | 26  | 162.799203 |
| device         | 75  | 28  | 149.196783 |
| system         | 77  | 30  | 148.040128 |
| user           | 69  | 26  | 142.191709 |
| interconnect   | 84  | 39  | 140.087373 |
| nanoscale      | 45  | 9   | 137.430053 |
| particular     | 106 | 57  | 137.391186 |
| least          | 172 | 95  | 136.26495  |
| elements       | 69  | 30  | 132.659336 |
| array          | 69  | 30  | 132.659336 |
| operation      | 81  | 42  | 129.226279 |
| design         | 58  | 22  | 128.823339 |
| plurality      | 65  | 29  | 127.100278 |
| fabric         | 40  | 8   | 126.374468 |
| signal         | 72  | 37  | 123.768008 |

---

#### 15) Virtual Patients

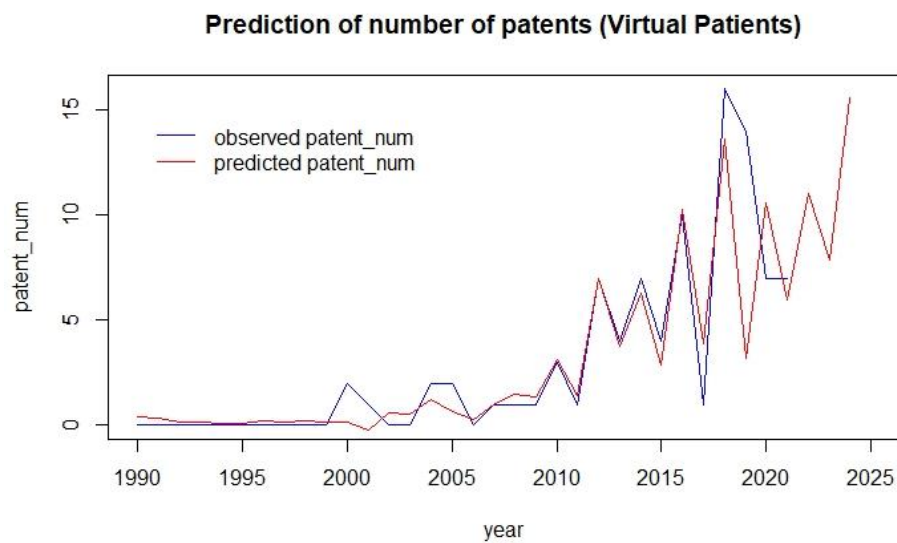

| word       | TF | DF | TF_IDF     |
|------------|----|----|------------|
| glucose    | 66 | 13 | 123.538944 |
| virtual    | 58 | 19 | 87.8773795 |
| data       | 51 | 17 | 82.6448752 |
| nitrogen   | 45 | 15 | 78.2221853 |
| insulin    | 39 | 12 | 75.8904958 |
| patient    | 77 | 33 | 75.8064216 |
| system     | 66 | 30 | 71.0735719 |
| simulation | 39 | 15 | 67.7925606 |
| device     | 32 | 11 | 64.8304914 |
| model      | 44 | 20 | 64.518831  |
| methods    | 61 | 31 | 63.7525398 |
| user       | 27 | 9  | 59.6234092 |
| healthcare | 26 | 9  | 57.4151348 |
| error      | 18 | 3  | 56.2421726 |
| sensor     | 21 | 6  | 53.8639365 |
| drug       | 32 | 16 | 53.6846772 |
| medical    | 34 | 18 | 53.2582979 |
| method     | 58 | 36 | 52.1966124 |
| ammonia    | 30 | 15 | 52.1481235 |

|               |    |    |            |
|---------------|----|----|------------|
| scavenging    | 30 | 15 | 52.1481235 |
| controller    | 19 | 5  | 51.6629007 |
| level         | 34 | 19 | 51.5143259 |
| physiological | 22 | 8  | 50.8999684 |
| least         | 29 | 15 | 50.4098527 |
| cost          | 16 | 3  | 49.9930423 |
| computer      | 27 | 14 | 48.6758512 |
| training      | 28 | 15 | 48.671582  |
| information   | 26 | 13 | 48.6668566 |
| image         | 21 | 8  | 48.5863335 |
| mpc           | 15 | 3  | 46.8684772 |

#### 16) Whole-Genome Synthesis

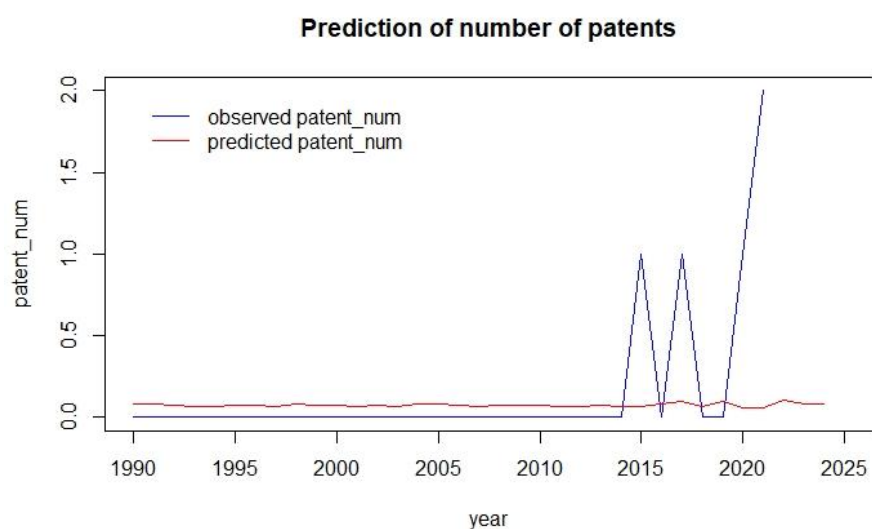

| word        | TF | DF | TF_IDF     |
|-------------|----|----|------------|
| optical     | 9  | 1  | 9.8875106  |
| perception  | 8  | 1  | 8.78889831 |
| depthimage  | 7  | 1  | 7.69028602 |
| layer       | 7  | 1  | 7.69028602 |
| sensor      | 10 | 2  | 6.93147181 |
| information | 6  | 1  | 6.59167373 |

|                 |   |   |            |
|-----------------|---|---|------------|
| map             | 6 | 1 | 6.59167373 |
| module          | 6 | 1 | 6.59167373 |
| object          | 8 | 2 | 5.54517744 |
| constructing    | 5 | 1 | 5.49306144 |
| robot           | 7 | 2 | 4.85203026 |
| area            | 4 | 1 | 4.39444915 |
| image           | 4 | 1 | 4.39444915 |
| material        | 4 | 1 | 4.39444915 |
| photoconductive | 4 | 1 | 4.39444915 |
| mode            | 4 | 1 | 4.39444915 |
| least           | 5 | 2 | 3.4657359  |
| system          | 5 | 2 | 3.4657359  |
| colored         | 3 | 1 | 3.29583687 |
| dynamic         | 3 | 1 | 3.29583687 |
| cover           | 3 | 1 | 3.29583687 |
| treatment       | 3 | 1 | 3.29583687 |
| audio           | 3 | 1 | 3.29583687 |
| audiovisual     | 3 | 1 | 3.29583687 |
| rcu             | 3 | 1 | 3.29583687 |
| visual          | 3 | 1 | 3.29583687 |
| humans          | 3 | 1 | 3.29583687 |
| apparatus       | 4 | 2 | 2.77258872 |
| adjusted        | 2 | 1 | 2.19722458 |
| adopted         | 2 | 1 | 2.19722458 |

---

## 2. SCI Papers Analysis Data

### 1) AI led molecular design



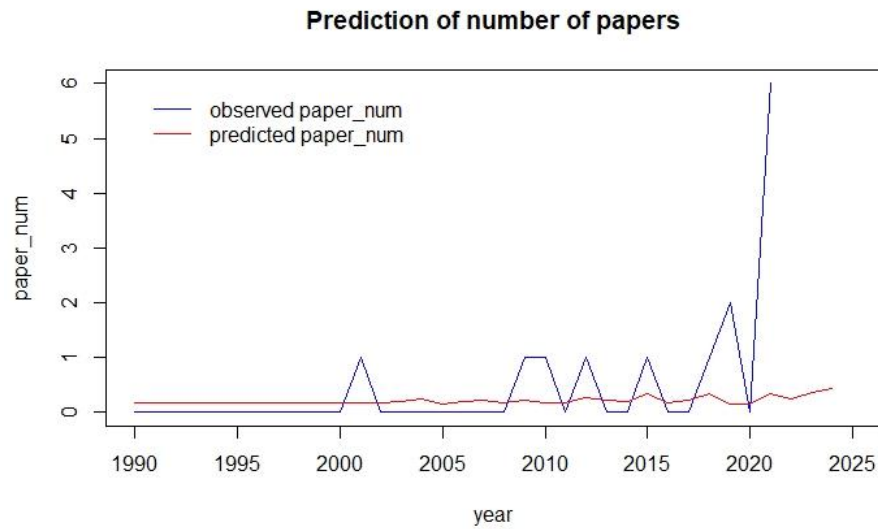

## 2) Algorithms for quantum computers

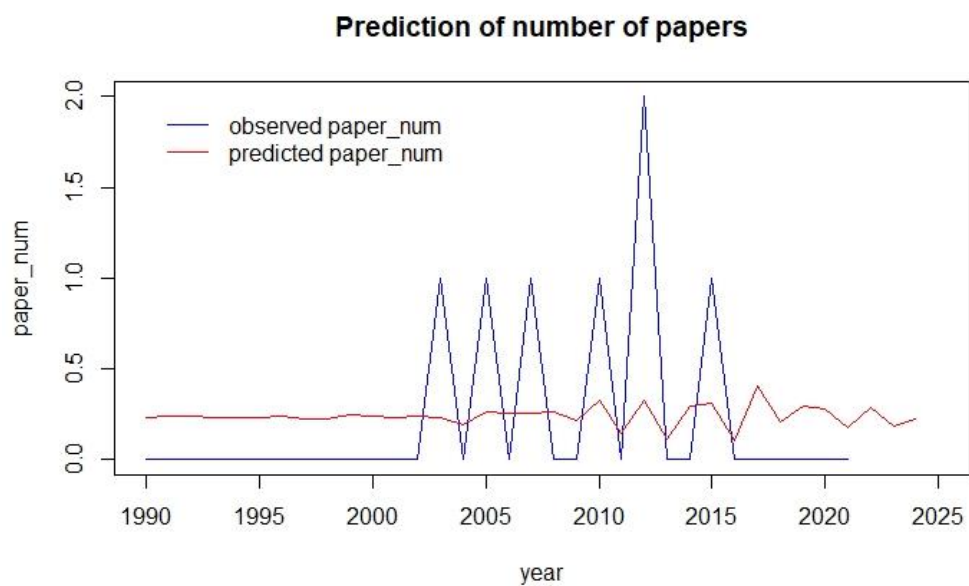

## 3) Augmented reality

**Prediction of number of papers (Augmented Reality)**

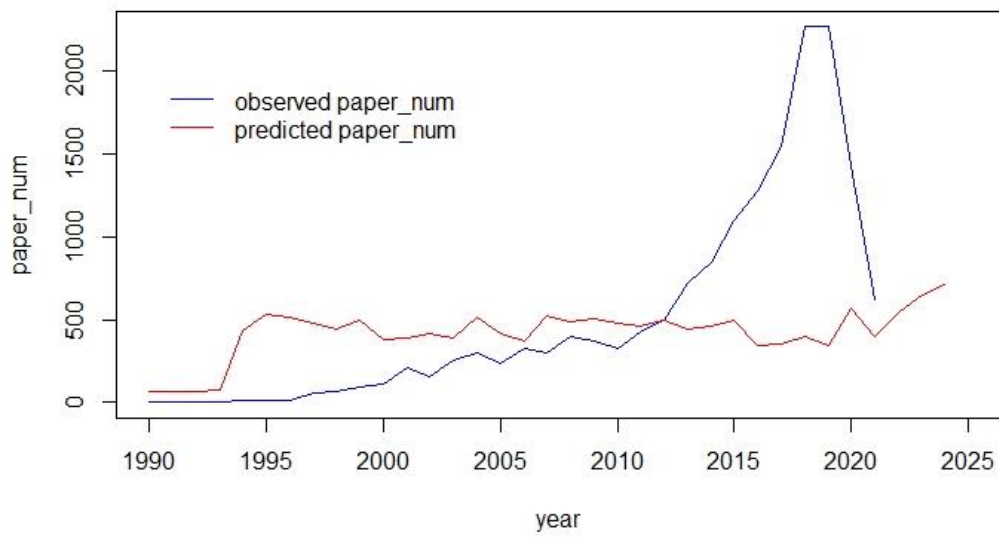

#### 4) Bioplastics for a Circular Economy

**Prediction of number of papers**

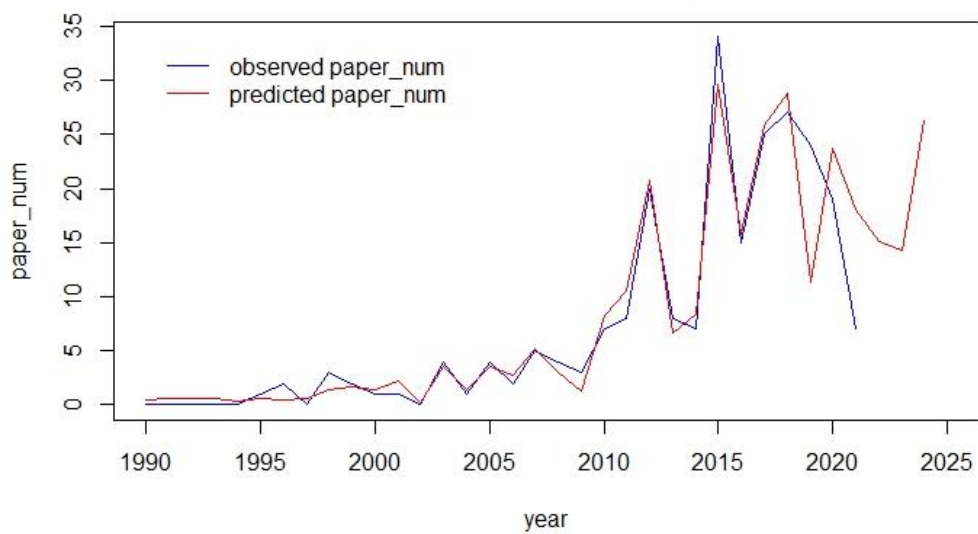

#### 5) Breath sensors diagnose disease

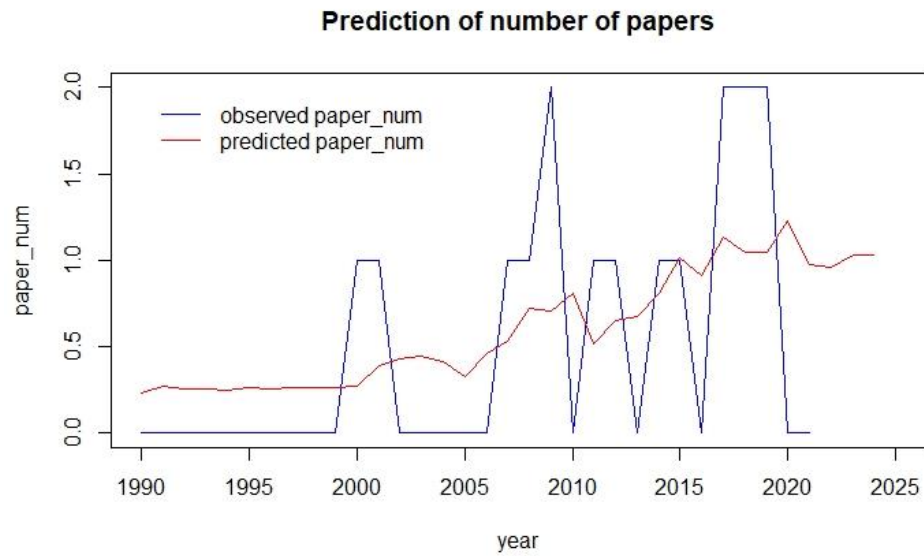

6) Collaborative Telepresence

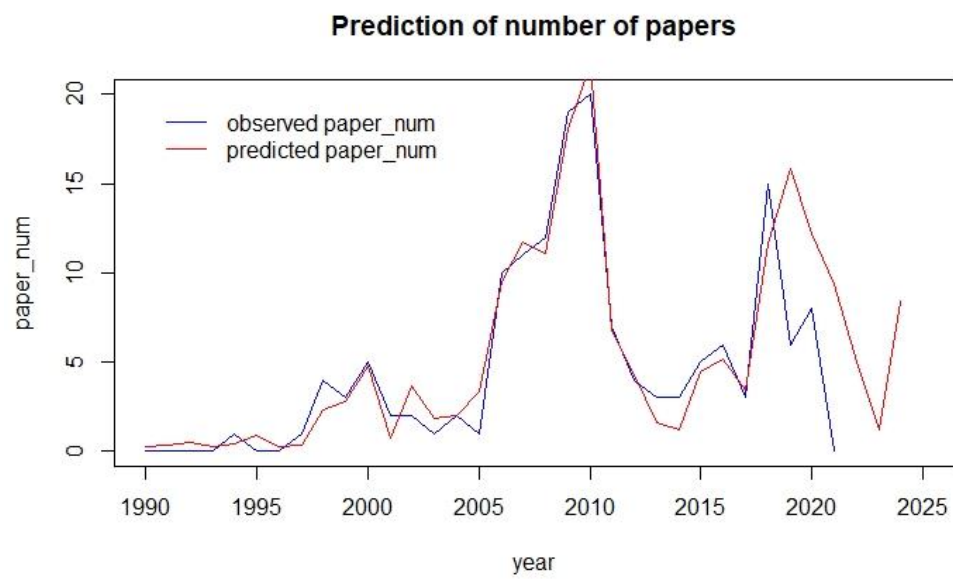

7) Decarbonization rises

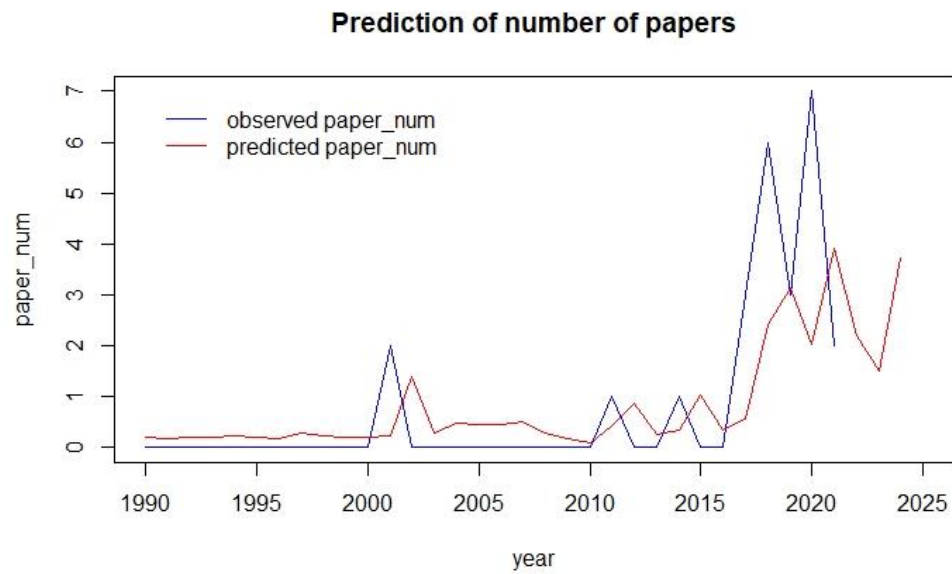

8) More capable digital helpers

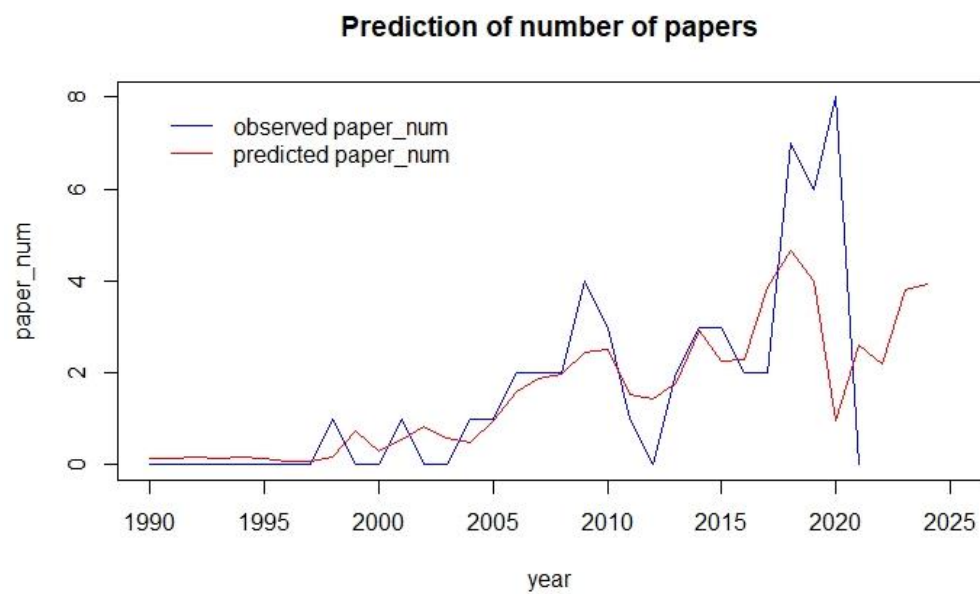

9) Digital Medicine

**Prediction of number of papers (Digital Medicine)**

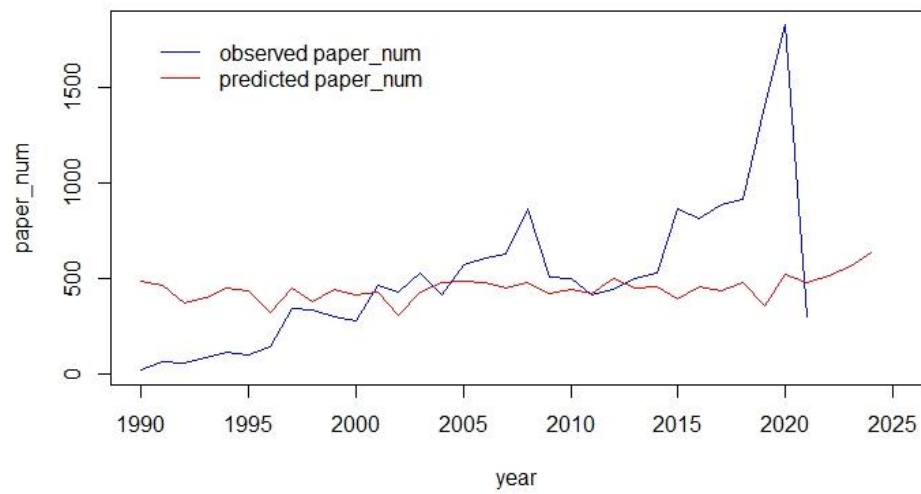

#### 10) Disordered Proteins as Drug Targets

**Prediction of number of papers**

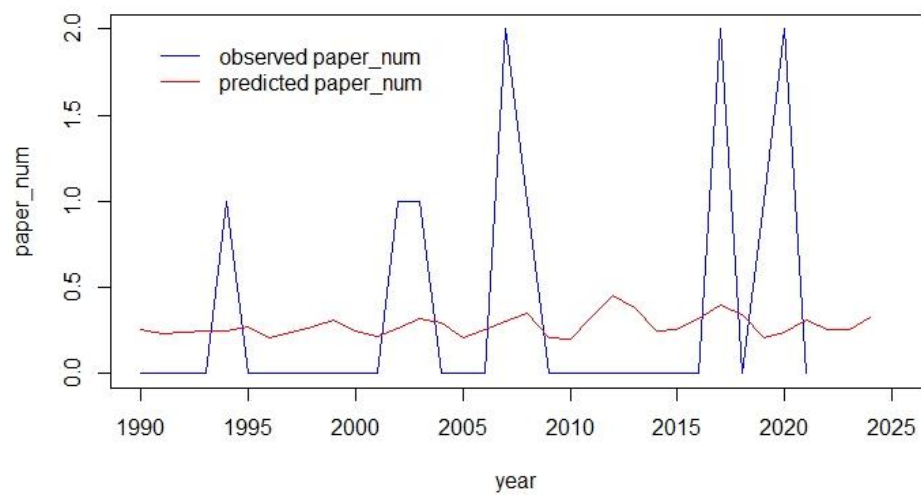

#### 11) DNA Data for Storage

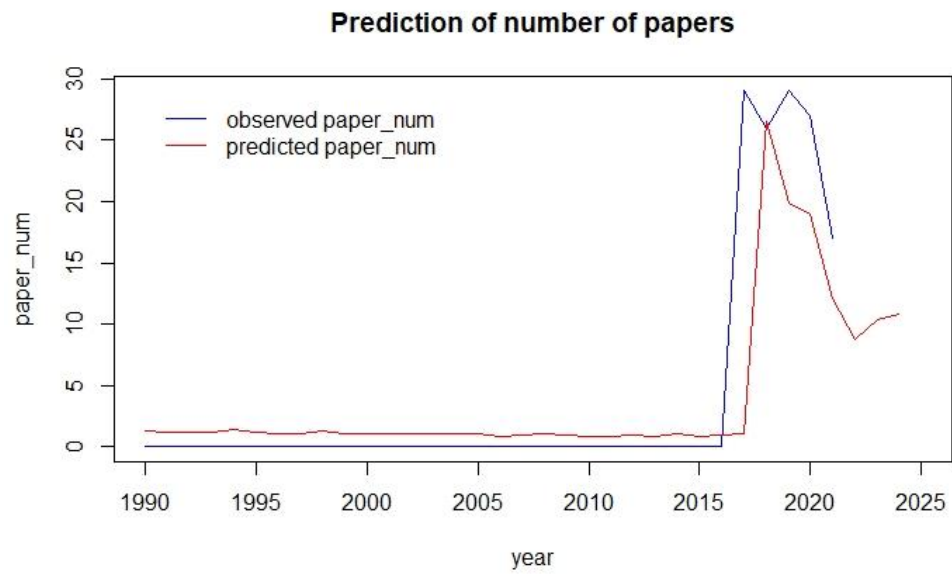

## 12) Implantable drug-making cells

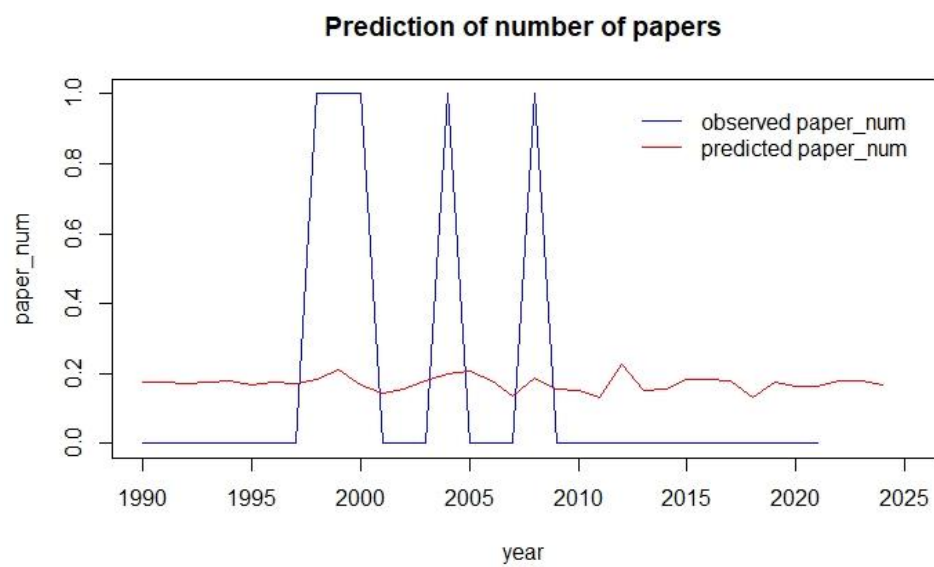

## 13) Electric Aviation

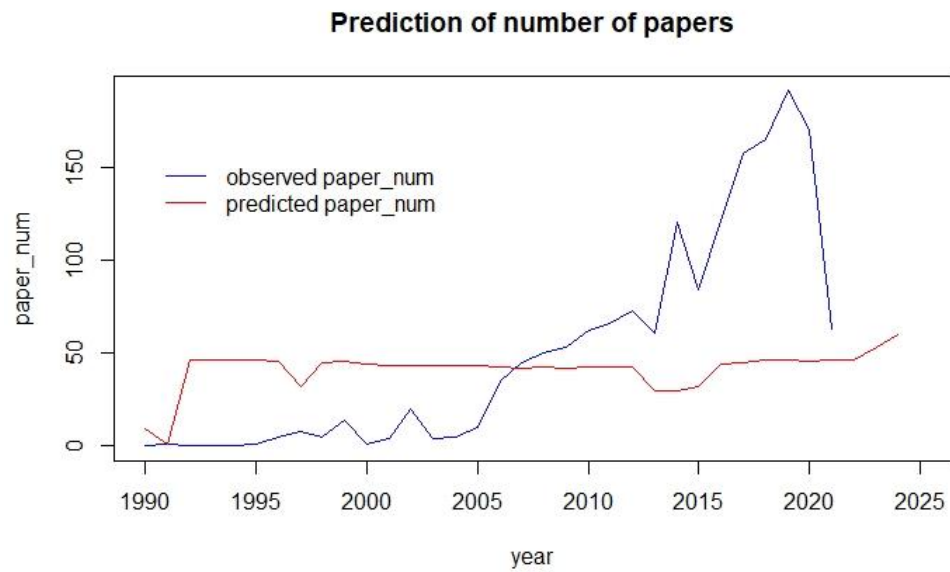

#### 14) Electroceuticals

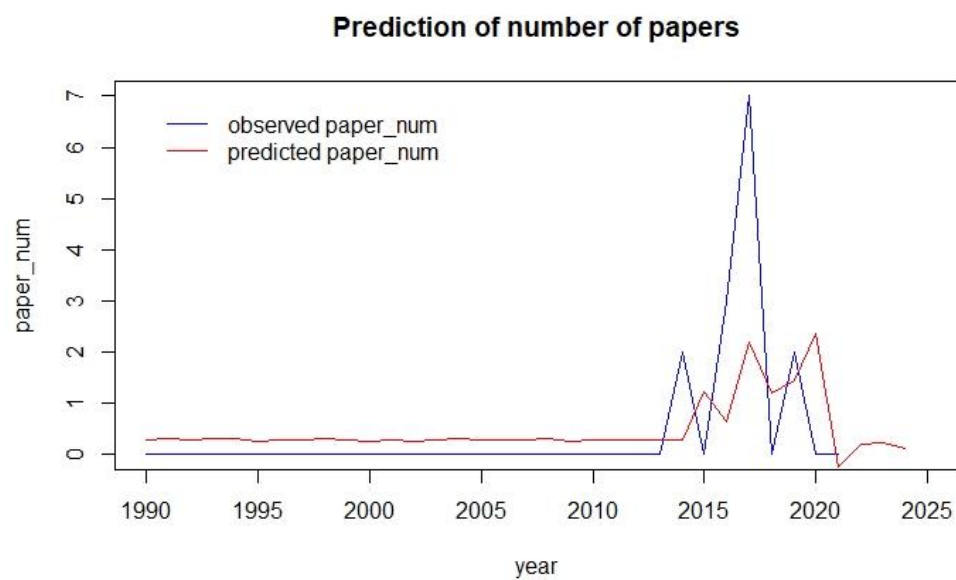

#### 15) Advanced Food Tracking and Packaging

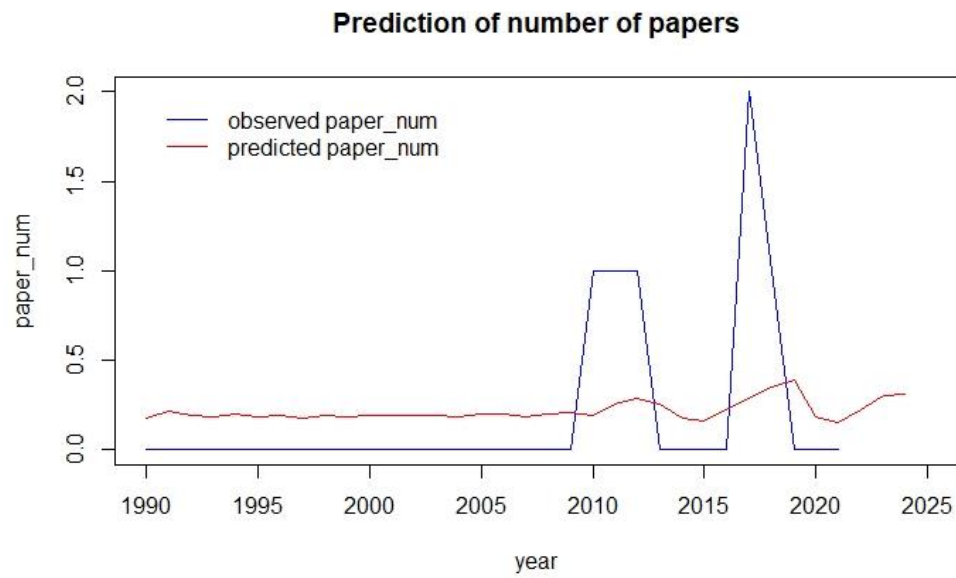

#### 16) Gene drive

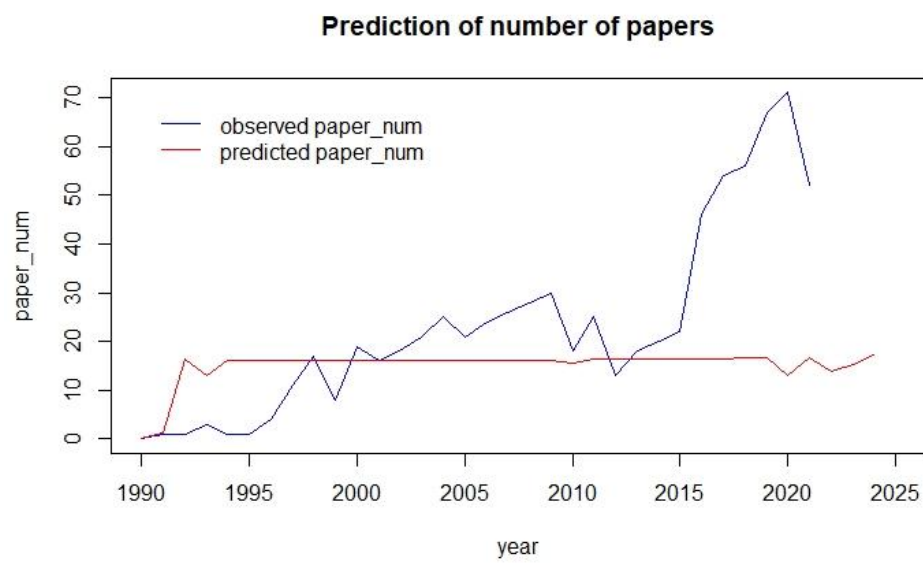

#### 17) Green ammonia



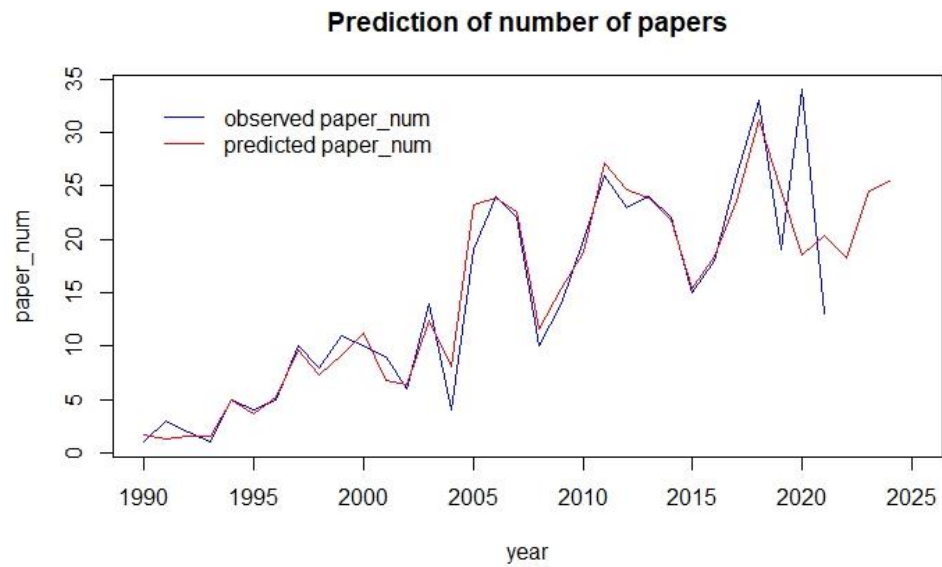

#### 18) Green Hydrogen

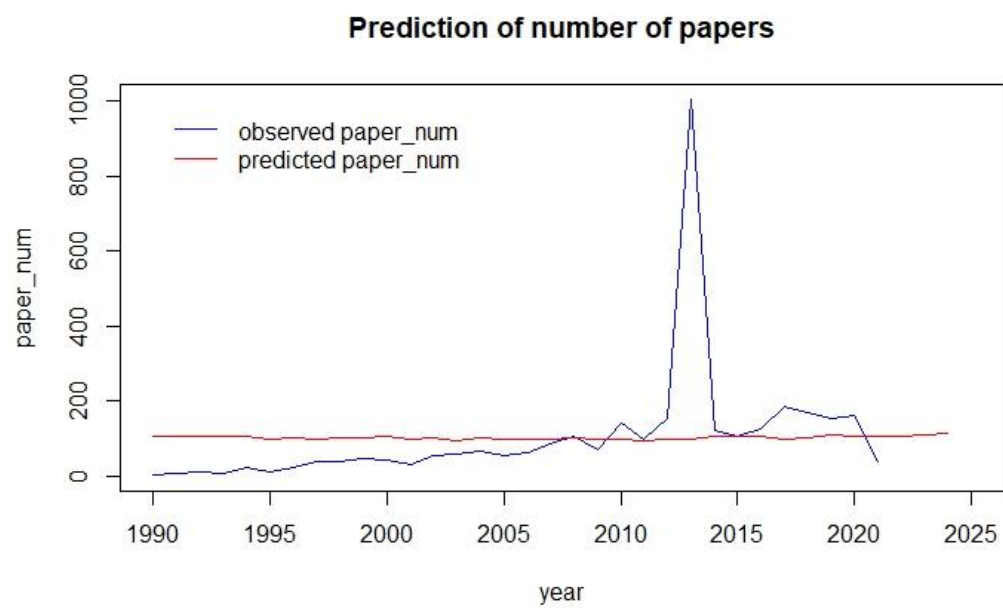

#### 19) Lower-Carbon Cement

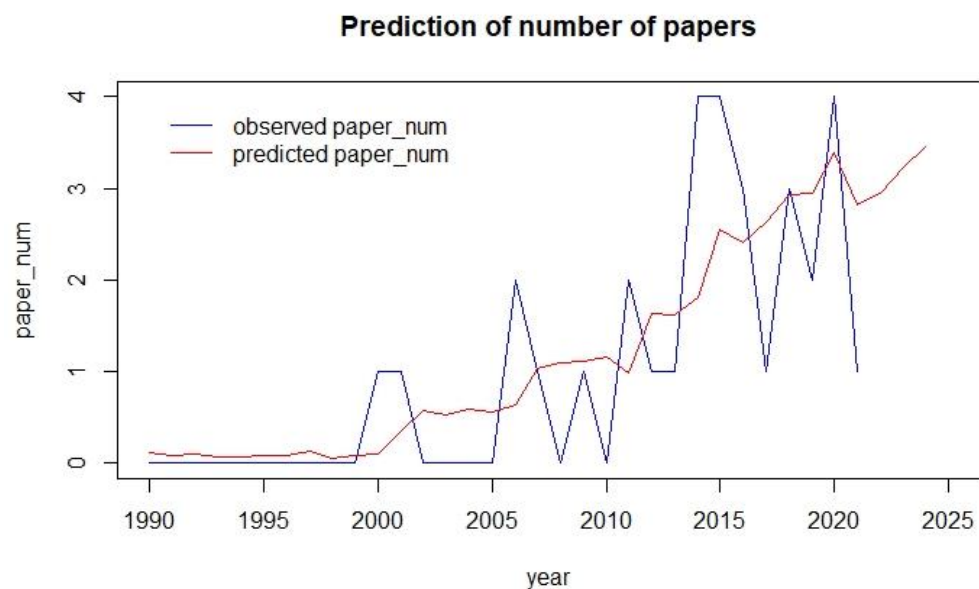

20) Microneedles for Painless Injections and Tests

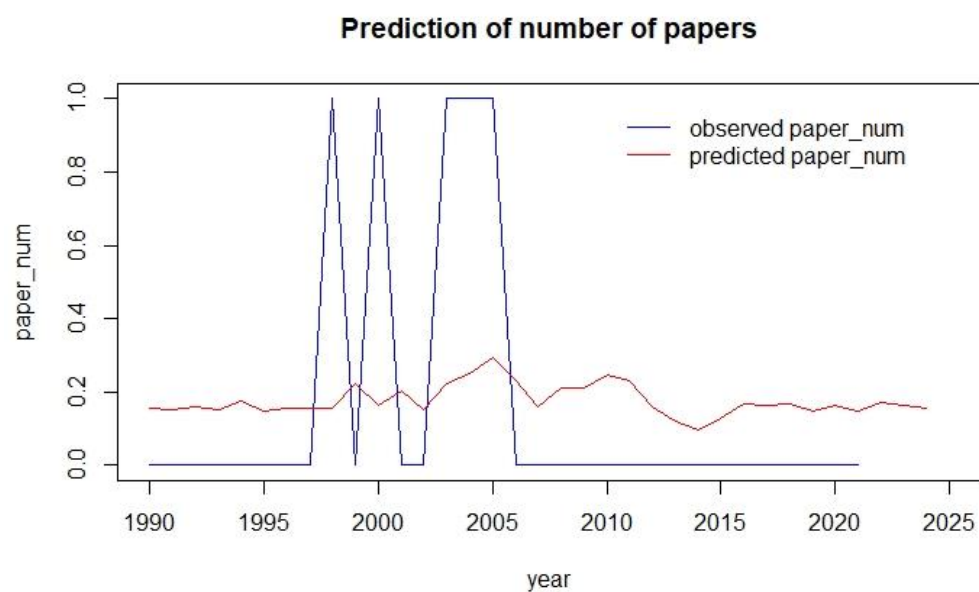

21) On-demand drug manufacturing

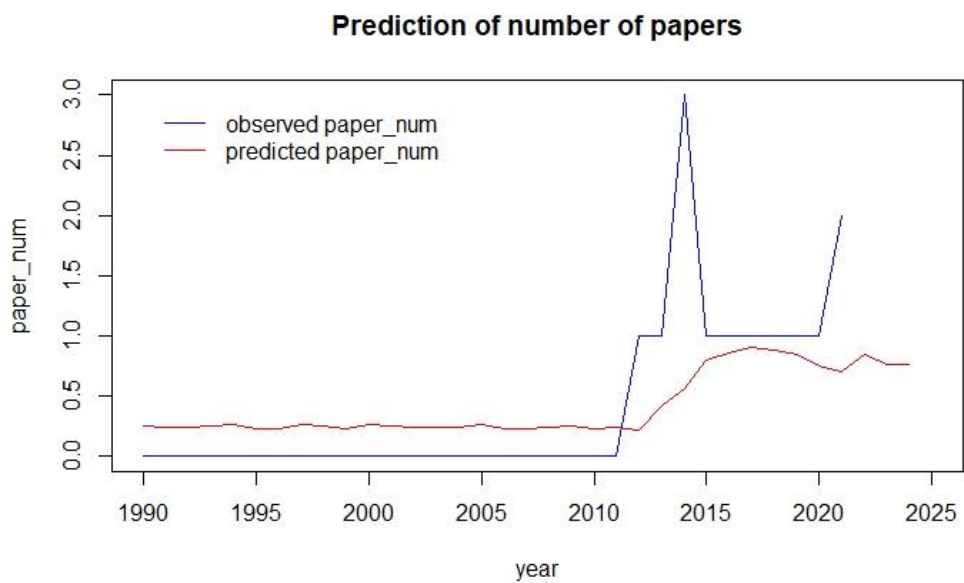

22) Personalized medicine

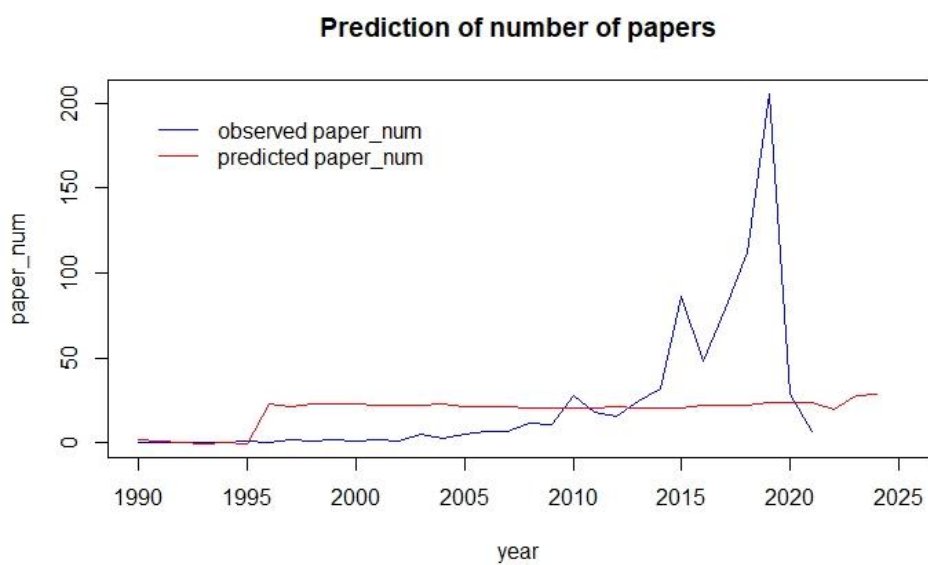

23) Plasmonic materials

**Prediction of number of papers (Plasmonic materials)**

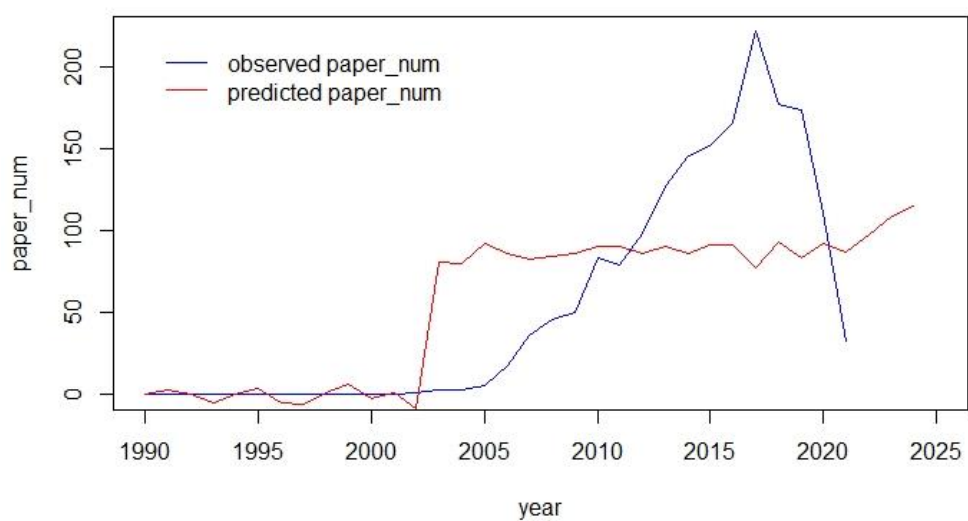

24) Quantum Sensing

**Prediction of number of papers**

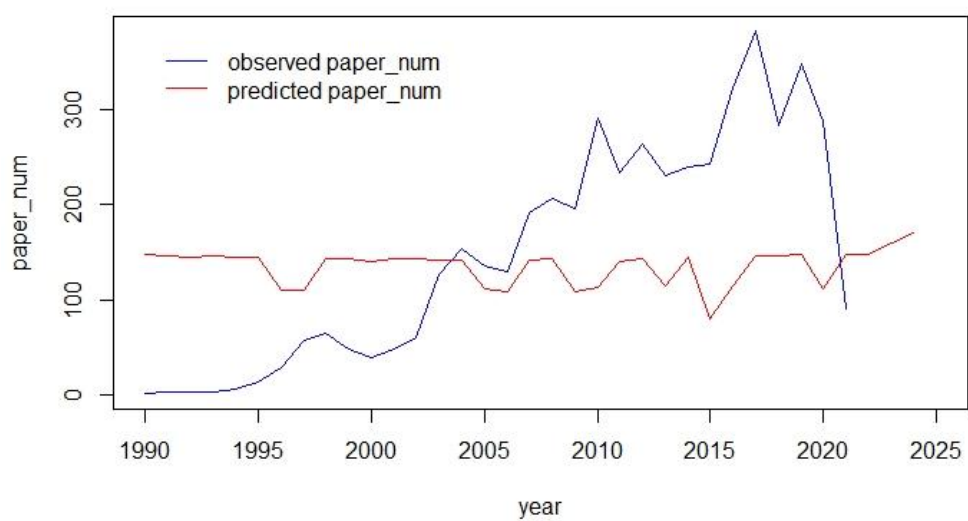

25) Safer Nuclear Reactors

**Prediction of number of papers**

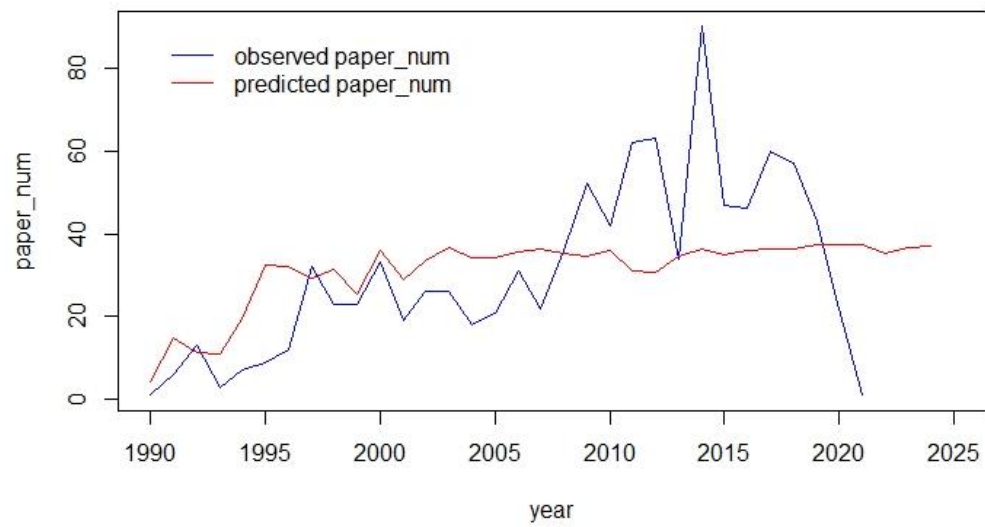

26) Smarter Fertilizers Can Reduce Environmental Contamination

**Prediction of number of papers**

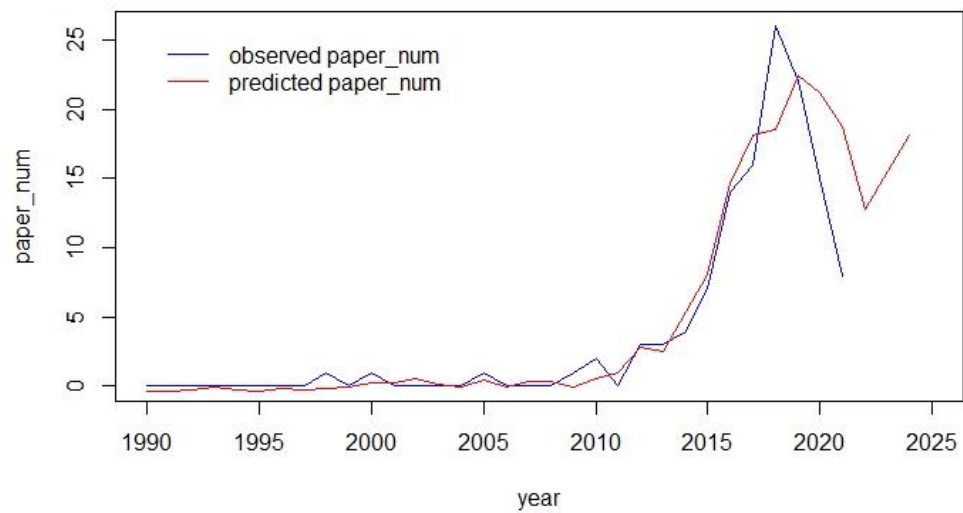

27) Social Robots

**Prediction of number of papers (Social Robots)**

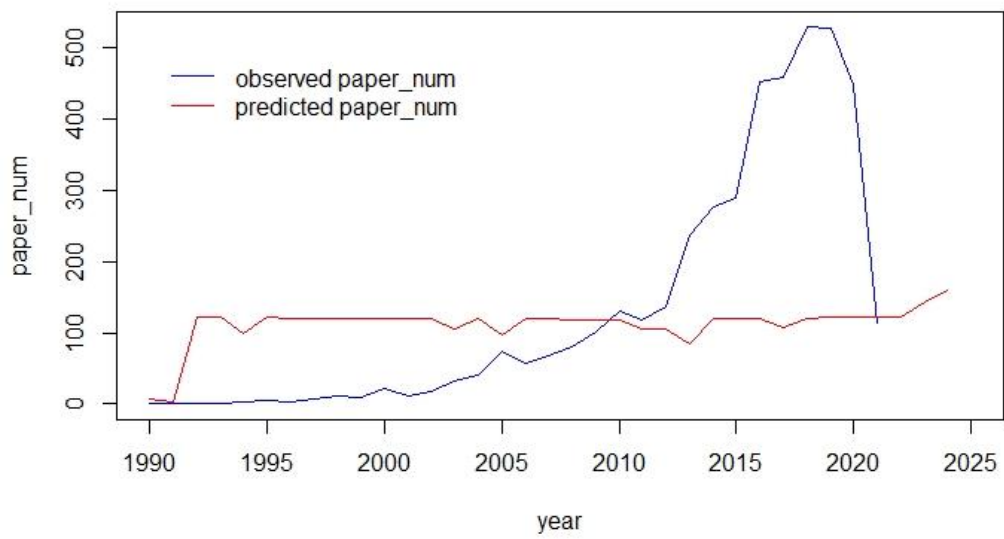

28) Spatial Computing

**Prediction of number of papers (Spatial Computing)**

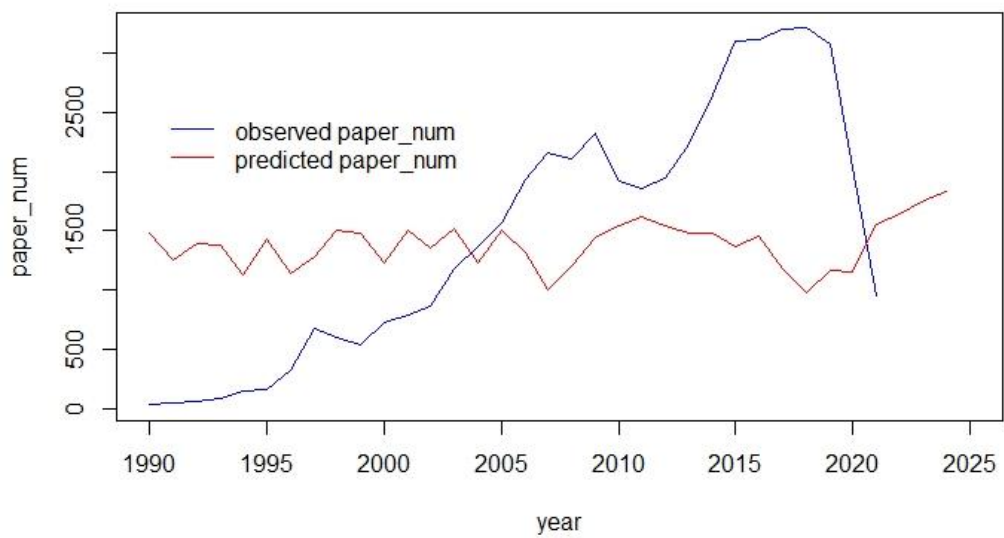

29) Utility-Scale Storage of Renewable Energy

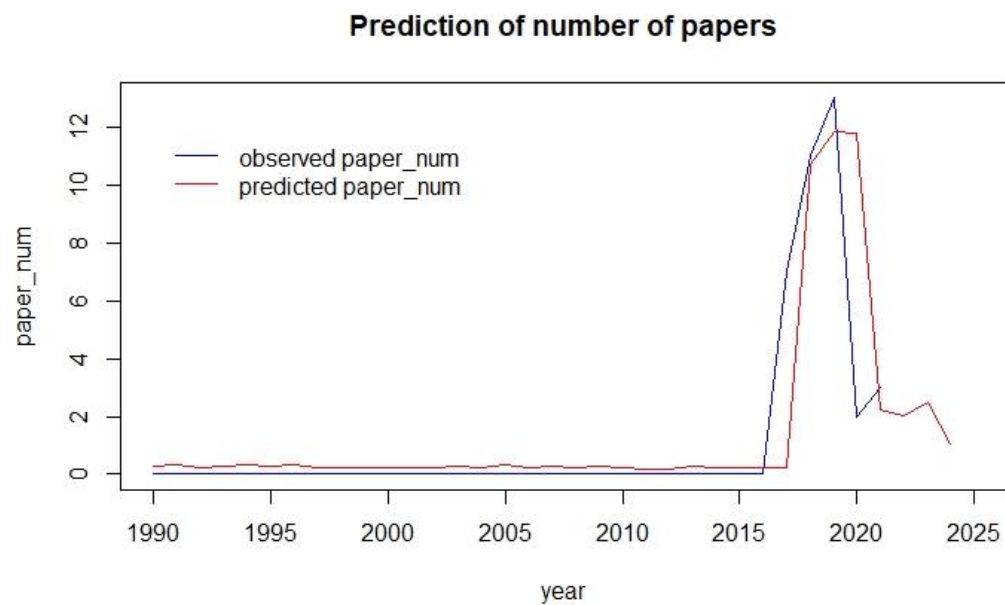

30) Tiny Lenses for Miniature Devices

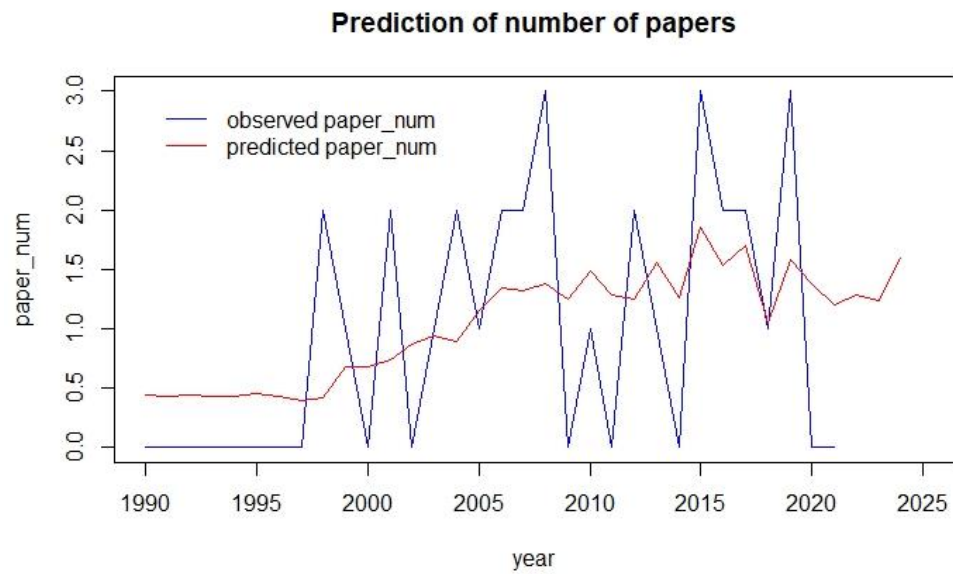

### 31) Virtual Patients

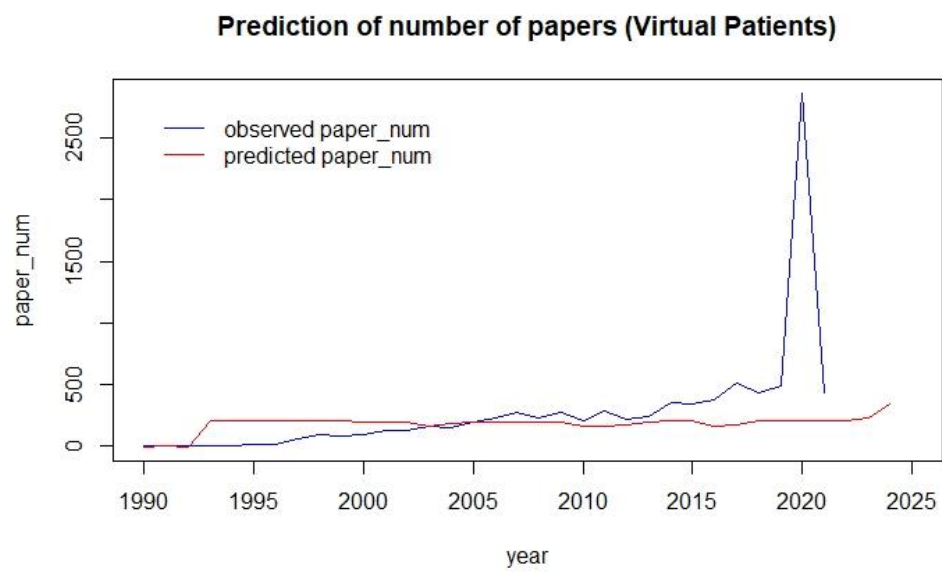



## 32) Whole-Genome Synthesis

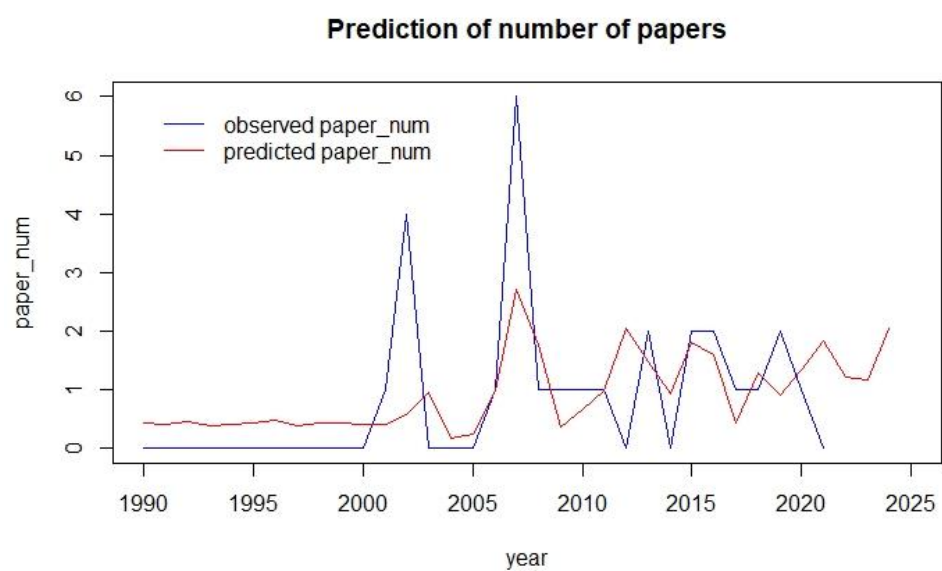

Supplement: s1 [file s1]
